# Supplementary material for: Area-averaged evapotranspiration over a heterogeneous land surface: Aggregation of multi-point EC flux measurements with high-resolution land-cover map and footprint analysis
Source: Copernicus journal article supplement (doi:10.5194/hess-2016-602), 2016-11-29
Supplement: Supplementary file [file hess-2016-602-AC4-supplement.pdf]

# Area-averaged evapotranspiration over a heterogeneous land surface: Aggregation of multi-point EC flux measurements with high-resolution land-cover map and footprint analysis

Feinan Xu<sup>1,2</sup>, Weizhen Wang<sup>1</sup>, Jiemin Wang<sup>1</sup>, Ziwei Xu<sup>3</sup>, Yuan Qi<sup>1</sup>, Yueru Wu<sup>1</sup>

<sup>1</sup> Key Laboratory of Remote Sensing of Gansu Province, Heihe Remote Sensing Experimental Research Station, Northwest Institute of Eco-Environment and Resources, Chinese Academy of Sciences, Lanzhou, 730000, China

<sup>2</sup> University of Chinese Academy of Sciences, Beijing, 100049, China

<sup>3</sup> State Key Laboratory of Remote Sensing Science, School of Geography, Beijing Normal University, Beijing, 100875, China

Correspondence to: Weizhen Wang ([weizhen@lzb.ac.cn](mailto:weizhen@lzb.ac.cn))

**Abstract.** The determination of area-averaged evapotranspiration (ET) at the satellite pixel scale/model grid scale over a heterogeneous land surface plays a significant role in developing and improving the parameterization schemes of the remote-sensing based ET estimation models and general hydro-meteorological models. The Heihe Watershed Allied Telemetry Experimental Research (HiWATER) flux matrix provided a unique opportunity to build an aggregation scheme for area-averaged fluxes. On the basis of HiWATER flux matrix dataset and high-resolution land-cover map, this study focused on estimating the area-averaged ET over a heterogeneous landscape with footprint analysis and multivariate regression. The procedure is as follows: Firstly, quality-control and uncertainty-estimation for the data of the flux matrix, including 17 eddy-covariance (EC) sites and 4 paths of large aperture scintillometer (LAS), were carefully done. Secondly, the representativeness of each EC site was quantitatively evaluated; footprint analysis was also performed for each LAS path. Thirdly, based on the high resolution land-cover map derived from aircraft remote sensing, a flux aggregation method was established combining footprint analysis and multiple-linear regression. Then, the area-averaged sensible heat fluxes obtained from the EC flux matrix were validated by the LAS measurements. Finally, the area-averaged ET of the kernel experimental area of HiWATER was

estimated. Compared with the formerly used and rather simple approaches, such as the arithmetic average and area-weighted methods etc., present scheme is not only with a much better database but also has a solid grounding in physics and mathematics in the integration of area-averaged fluxes over a heterogeneous surface. Results from this study, both instantaneous and daily ET at the satellite pixel scale, can be used for the validation of relevant remote sensing models and land surface process models. Furthermore, this work will be extended to the water balance study of the whole Heihe River basin.

## 1 Introduction

Land surface evapotranspiration (ET) is not only a key component in the regional water circulation, but also essential in the surface energy balances and land surface process. Under the condition of increasing shortage of water resources, high precision estimation of ET at regional scale is essential for such applications, as the management of river basin water resources, regional planning and the sustainable development of agriculture etc. (Wang et al., 2003). Currently, the commonly used methods for acquisition of regional ET are ground-based observation, remote sensing based estimation and model simulation, respectively.

The Earth's surface is always characterized by spatial heterogeneity. Large land surface heterogeneity affects greatly the exchanges of momentum, heat, and water between the land surface and atmosphere (Mengelkamp et al., 2006). Indeed, the surface heterogeneity caused either by the contrast in soil moisture or vegetation type generates a large spatial variability of fluxes, which limit the use of the eddy-covariance (EC) system, unless one deploys a network of EC devices (Ezzahar et al., 2009b). Flux tower group can quantify the turbulent exchange of energy and mass between the atmosphere and a variety of surface types (Sellers et al., 1995), and these local point measurements need to be aggregated to provide a meaningful area averaged fluxes (André et al., 1986). If special aggregation rules for local flux measurements are applied, measurements can provide averaged fluxes at model grid scale (Beyrich et al., 2006;Mahrt et al., 2001). But given the EC network's high price and the requirement for their

continuous maintenance, the large aperture scintillometer (LAS) is a useful alternative method for directly measurements of area-averaged sensible heat fluxes **in the scale of 1 – 5 km** (Ezzahar et al., 2009b;Ezzahar and Chehbouni, 2009).

**Satellite has** been considered as a promising data source for deriving regional ET with the development of remote sensing technique (Ezzahar et al., 2009a). In response to increasing demand for spatially distributed hydrologic information, many satellite-based approaches have been developed for routine monitoring of ET at **a regional scale** (Anderson et al., 2012). Nevertheless, the effectiveness of the **remote sensing based** methods for estimating ET must be fully assessed by ground-based area-averaged flux measurements, due to the uncertainties of model inputs and parameterization schemes **etc.** (Wang et al., 2003). Furthermore, there **may be** a bias in directly comparing a **remote-sensing-based** ET estimation with in-situ measurements, because of their spatial-scale mismatch and spatial heterogeneity at the sub-pixel scale (Jia et al., 2012).

General atmospheric-hydrological models (e.g., Numerical Weather Prediction) can adequately describe the interaction between the atmosphere and the underlying surface using complex parameterization schemes. The development and validation of these models are usually based on measurements performed over homogeneous land surfaces. While the assumption of homogeneity might be justified at the local scale ( $10\text{ m} - 10^3\text{ m}$ ), it is often violated at the scale of the grid resolution of current regional atmospheric models (about  $10^4\text{ m}$ ) (Beyrich et al., 2006;Beyrich and Mengelkamp, 2006). Therefore, it is significantly important to determine the area-averaged surface fluxes at the satellite pixel scale/model grid scale ( $10^3\text{ m} - 10^4\text{ m}$ ) for the evaluation of general hydro-meteorological models and **relevant remote sensing models**.

A number of international field experiments have been performed over heterogeneous land surfaces in different geographical and climate regions of the earth in recent decades (Mengelkamp et al., 2006;Beyrich et al., 2006;Wang, 1999), such as HAPEX–MOBILHY (André et al., 1986), FIFE (Sellers et al., 1988), HAPEX-SAHEL (Goutorbe et al., 1994), BOREAS (Sellers et al., 1995), NOPEX (Halldin

et al., 1998), LITFASS-2003 (Mengelkamp et al., 2006), etc. In these experiments, based on multi-point flux observations, surface fluxes at the model grid scale were obtained using various flux aggregation techniques. The aggregated fluxes were also compared with those obtained from LAS systems and remote-sensing estimation methods. The simple flux aggregation methods most commonly used in former studies mainly include: arithmetic average method, the area-weighted method and the footprint-weighted method (Liu et al., 2016). These studies revealed, under careful data-processing and quality-control (Charuchittipan et al., 2014) as well as analysis of the energy balance closure for flux data (Foken et al., 2006;Foken et al., 2010), the combination of area-averaged fluxes from scintillometers and aircraft observations etc. and the multi-site EC flux measurements with simple flux aggregation schemes can provide reasonable estimates over a heterogeneous land surface (Mahrt et al., 2001;Beyrich et al., 2006;Liu et al., 2016).

However, the integration schemes of aforementioned methods are applicable for relative uniform sites, of which the local flux measurements are representative of the individual surface types. For the interpretation of tower flux measurements over a heterogeneous land surface, operational footprint analysis is an essential approach (Schmid, 2002). The development of footprint models provides diagnostic tools to quantify the representativeness of tower flux measurements for selected sites (Horst and Weil, 1992;Kim et al., 2006). Besides, it had been demonstrated that the footprint climatology can be combined with information on the spatial variability of vegetation types provided by satellite image (Kim et al., 2006;Chen et al., 2008). Land cover reflects the combined effects of vegetation, climate, soil and topography, some relationship should be expected between land cover and measured surface fluxes (Ogunjemiyo et al., 2003). Ran et al. (2016) proposed four indicators with footprint analysis and land-cover map to improve the representativity of EC towers and correct the EC flux measurements. But this method did not obtain the surface fluxes of individual land cover types but just corrected the EC observations with some prior coefficients. Some previous studies have successfully related the aircraft observed fluxes to surface cover types with the integration of footprint models and land-cover

map derived from satellite remote sensing (Ogunjemiyo et al., 2003; Kirby et al., 2008; Hutjes et al., 2010). Among these works, a flux dis-aggregation method (Hutjes et al., 2010), developed from former study presented by Ogunjemiyo et al. (2003), would be a promising method for integrate multiple tower-based flux measurements to satellite pixel or grid scale on account of its theoretical framework.

5 The application of this method in attributing heterogeneous EC flux measurements to separate land over classes will be a hopeful way to have insight into the component fluxes from various land cover types and to develop a flux aggregation scheme, exploring for the extension of multiple EC flux observations to satellite pixel/gird scale.

A multi-scale observation experiment on evapotranspiration over a heterogeneous land surface was  
10 conducted in the middle reaches of Heihe River Basin during the Project of HiWATER (Heihe Watershed Allied Telemetry Experimental Research) in 2012 (Li et al., 2013; Liu et al., 2016). A comprehensive flux matrix, consisted of 17 EC sites and 4 groups of LAS systems within a  $5 \times 5 \text{ km}^2$  area, was specifically designed to capture the multi-scale characteristics of ET over a heterogeneous landscape during the experiment. HiWATER flux matrix, with an abundant of multi-scale flux  
15 measurements, provided a unique opportunity to build an aggregation scheme for area-averaged fluxes over a heterogeneous land surface. The objective of this study is to integrate multi-point EC flux measurements to area-averaged fluxes over a heterogeneous land surface with high resolution land-cover data and footprint analysis. The main issues were as followed: (1) the representativeness of EC flux matrix was quantitatively evaluated; (2) a flux aggregation scheme was established to estimate  
20 the area-averaged sensible heat fluxes, taking LAS measurements as reference to check the integration algorithm; (3) the developed flux aggregation method was applied to EC flux matrix to determine the area-averaged evapotranspiration.

## 2 Study sites and data

### 2.1 Site description

This study was based on ground-based observation datasets, collected from the multi-scale flux matrix of HiWATER from May to September 2012. The kernel experimental area ( $5 \times 5 \text{ km}^2$ ) of the multi-scale observation experiment was located in the Yingke and Daman irrigation district within Zhangye oasis. The land-cover types were dominated by maize (72 %), vegetables (5 %), orchard and shelterbelt (8 %) and residential area and roads (15 %). As shown by the numbers 1 – 17 in the following Fig. 1, 17 sites were installed according to the distribution of crop planting structure and land cover. Each of them was equipped with an eddy covariance system (with two layers in site 15) and an automatic weather station (AWS), to capture the exchange process of surface water and energy budget at the local scale and micrometeorological elements near the surface layer. Spatial distribution of EC/AWS systems is shown in Fig. 1, with site 1 of vegetable (pepper) field, site 4 of residential area, site 17 of apple orchard, and the others are in maize fields. Key micrometeorological observations at each AWS included four-component radiation, one or two levels wind / temperature / relative humidity, soil temperature / moisture and soil heat flux, etc. Among these sites, site 15 was a superstation equipped with two levels of EC system, and seven-level wind speed/direction, air temperature/humidity profiles. 4 paths of large aperture scintillometers were installed crossed over the experimental district to obtain area-averaged sensible heat fluxes (see Fig. 1). Details of the EC and LAS systems in the flux matrix were given in Table 1 and Table 2, respectively.

## 2.2 Data collection, processing and quality control

### 2.2.1 Flux data processing and quality control

Data in typical clear days of 29 to 30 June 2012 were selected for the following analysis, including EC data from 16 towers (except site 3 and the highest level (34 m) of site 15) and 4 paths of LAS data as well as multi-point micrometeorological data list above. The last round of irrigation in each plot was done before 26 June. During the two days, there was almost no irrigation in the flux matrix. Firstly, AWS data sampled at 10 min were averaged to 30 min period. Careful data processing and quality

control for EC and LAS raw data were then performed so as to insure a high quality flux dataset.

The EddyPro software developed by LI-COR (Lincoln, Nebraska USA, [www.licor.com/eddypro](http://www.licor.com/eddypro)) was used to process the 10 Hz raw EC data into a half-hourly averaged flux data, by procedures including spike removal, angle of attack correction (for Gill), time lag correction, coordinate rotation (2-D rotation), frequency response correction, sonic virtual temperature correction, and corrections for density fluctuation (Webb-Pearman-Leuning, WPL) etc. Data quality assessment was performed for the turbulent flux in each 30 min using the flagging system with 3 different flags (0, 1 and 2) (Mauder and Foken, 2015). Detailed information on the processing steps can be found in Wang et al. (2015) and Xu et al. (2013). For this study, only the flux data of flag 0 (the best) were used. Flux data of flag 2, as well as the data at night when the friction velocity was below  $0.1 \text{ m s}^{-1}$  were discarded (Blanken, 1998; Liu et al., 2011). To obtain daily ET, at first, a gap-filling method, based on the nonlinear regression (establishing the relationship between the latent heat flux and net radiation), for the 30-min latent heat fluxes (LE) was used. Then, the daily ET was calculated by summing the half-hourly gap-filled ET to 24 h totals.

For the EC systems used in the data analysis, we have tried to reduce the systematic errors to a minimum with a pre-observation inter-comparison, and careful maintenances during the observation period (Xu et al., 2013). The random errors were also analyzed by a separate research, which can be minimized in an ensemble average (Wang et al., 2015). The energy balance closure ratio (EBR) for the EC data of the flux matrix was also carefully assessed. Generally, the EBR during the 3 and half months was good. For the 17 EC stations in the intensive observation area, the average EBR was about 0.92. Except the lowest EBR (0.78) in orchard site, values in other sites were scattered without clear relation to the surface status. For site 15 with two heights of EC system, the relevant EBR were 0.89 (at 4.5 m) and 1.03 (for 34 m), respectively (Xu et al., 2017).

The LAS system provided a measurement of the structure parameter for the refractive index of air ( $C_n^2$ ) with an output period of 1 min. The raw data were firstly checked, mainly reject the saturated cases

when  $C_n^2 < 0.193R^{8/3}\lambda^{1/3}D^{5/3}$  (where  $R$  is the path length,  $D$  the optical aperture, and  $\lambda$  the wavelength) (Ochs and Wilson, 1993). Then, the data were averaged to 30 min, and the path-average sensible heat fluxes were iteratively calculated based on Moninin-Obukhov Similarity Theory (MOST) (Andreas, 1988). The parameters used in this calculation, like the roughness height and zero-plane displacement were obtained following Martano (2000); other parameters, including wind speed, air pressure and temperature, Obukhov length, and Bowen ratio, were directly obtained from relevant EC measurements. Only sensible heat fluxes from LAS measurements at daytime (8:30 am – 15:30 pm, Beijing Standard Time, BST; the time difference between Local time and BST is approximately +1 h 18 min) were selected in this study.

As for the eddy-covariance systems, flux data from the 4 paths of LAS were also quality controlled. The systematic errors from data processing, e.g. the larger effects of Bowen-ratio correction in this oasis area, were carefully minimized. We checked the sensible heat fluxes ( $H$ ) from the 4 paths of LAS with that from the nearer ECs. Except LAS 3, under its path there were clearly some village buildings so the  $H_{las}$  is higher, others agreed very well with that of ECs.

## 2.2.2 Collection and processing of remote-sensing products

Based on the airborne hyper-spectral images acquired by the Compact Airborne Spectrographic Imager (CASI) on 29 June 2012 and the Canopy Height Model (CHM) data from the LiDAR data collected on 9 July 2012, a land cover classification map with 1-m spatial resolution was derived using an object-based classification method. This was done mainly for the kernel experimental area. The classification accuracy of the 1-m land cover map is up to 90 %, and Kappa coefficient is approximately 0.9. The detailed classification process of the map can be found in Liu and Bo (2015).

Land cover misclassification was still occurred in this map because of spectral similarity, especially in the edges of different surface cover types. To obtain a more accurate land cover map, the misclassified patches of the land cover were visually and manually revised according to the high



resolution CCD images (acquired on 26 July) and the Google Earth imagery (on 3 September 2012). Finally, for the aim of this study, the refined 12 kinds of land classification types in the study area, of which most were different vegetables of small areas, were merged into 4 kinds (maize, vegetables, woods and non-vegetation types) in accordance with crop species and surface types, as shown in Fig. 1. Among the four land cover types, the non-vegetation types mainly contain two types of land surface cover, namely buildings and road; while the woods type consists of orchard and shelterbelt.

### 3 Methodology

#### 3.1 Aggregation method combining footprint analysis and multivariate regression

It is generally accepted that an average flux equals the area-weighted sum of the component fluxes emanating from individual land cover classes (Hutjes et al., 2010).

$$F = \sum_{k=1}^n A_k F_k \quad (1)$$

Where  $F$  is the total flux of any scalar (e.g. the sensible and latent heat flux in the case) for a specified area,  $A_k$  is the fractional coverage of an individual land cover class  $k$  within that area,  $F_k$  is the flux emanating from the individual land cover class  $k$ ;  $n$  is the number of land cover classes that is distinguished in the specified area.

The observed flux ( $F_{obs}$ ) at height  $z_m$  can be closely related to the true surface flux from upwind measurement point through the footprint function, in continuous form (Leclerc and Foken, 2014):

$$F_{obs}(x_{obs}, y_{obs}, z_m) = \int_{-\infty}^{\infty} \int_{-\infty}^{\infty} F(x, y, 0) w(x, y, z_m) dx dy \quad (2)$$

Here  $x_{obs}$ ,  $y_{obs}$  are the site coordinates,  $z_m$  is the effective observation height, defined as  $z_m = z - d$  (where  $z$  is the sensor height,  $d$  the zero-plane displacement). The footprint function  $w(x, y, z_m)$  describes the flux portion seen at  $(x_{obs}, y_{obs}, z_m)$ . Equation (2) can be discretized for a uniform grid over a landscape, as in a land cover classification map based on satellite image, leaving out the height

dependence for simplification. Equation (2) becomes:

$$F_{obs} = \sum_{k=1}^n F_k \sum_{i=1}^N \sum_{j=1}^M w_{ij} \Delta x \Delta y \quad (3)$$

Where each pixel  $\Delta x \Delta y$  of the map is assumed to be homogeneous, which is uniquely classified as belonging to class  $k$ . The fraction of the  $k$ -th land cover type in the footprint ( $fp$ ) is then defined as:

$$X_{fp,k} = \sum_{i=1}^N \sum_{j=1}^M w_{ij} \Delta x \Delta y \quad (4)$$

Combing Eq. (3) and Eq. (4), the multi-linear model for the flux becomes:

$$F_{obs} = \sum_{k=1}^n F_k X_{fp,k} \quad (5)$$

A critical assumption under the flux aggregation method is that each land cover  $k$  (area  $A_k$ ) is with a constant source strength ( $F_k$ ). Thus, as Eq. (1), flux ( $F$ ) for a specific area is a weighted aggregation of its various land cover classes. Base on multi-point tower flux measurements ( $F_{obs}$ ), multiple linear regression equations can be formulated by overlaying flux footprint with land-cover map ( $X_{fp,k}$ ) as follows Eq. (5). In this study, the multiple-linear regression method (using the ‘regress’ algorithm from the Matlab® statistical toolbox) determined the regression coefficients (estimates of the specific flux for each land cover class in the case,  $F_k$ ) by minimizing the squared residuals. For each LAS path, the measured flux (e.g. sensible heat flux) can also be dis-aggregated into component flux by relevant footprint function as Eq. (5). This can be taken as a validation of the former step.

The accuracy of this method is highly dependent on four aspects: (1) better flux data for all EC sites; (2) better land cover classification map; (3) more precise flux footprint analysis; (4) good flux and footprint data for LAS. So properly processed flux data, accurate high-resolution land cover map and appropriate footprint models are the foundation of formulating a better multiple linear regression. Sometimes, the established multi-linear regression equations may not be solvable. When suffered this problem, the classification accuracy of the used land cover map should be carefully checked, and the

selected footprint model should be verified whether it's applicable.

### 3.2 Footprint models

The Eulerian analytical footprint model, which developed by Kormann and Meixner (2001), was used for estimating the single time flux footprint of EC measurements, due to its ease of use and wide range of stability as well as its numerical stability (Leclerc and Foken, 2014). Besides, as we have checked, its footprint estimates were in good agreement with the calculations of more sophisticated backward Lagrangian footprint models, such as the Kljun scheme (Kljun et al., 2002; Kljun et al., 2015). The footprint function  $w(x, y, z)$  can be expressed in terms of a crosswind integrated flux footprint function,  $f^y(x, z)$ , and a Gaussian crosswind distribution function,  $D_y(x, y)$ . The analytic solution of Kormann and Meixner (2001) is followed by Eq. (6). More details on the derivation of  $f^y(x, z)$  and  $D_y(x, y)$  as well as the relevant parameters can be seen in Kormann and Meixner (2001).

$$w(x, y, z) = f^y(x, z) \bullet D_y = \frac{1}{\Gamma(\mu)} \frac{\xi^\mu}{x^{1+\mu}} e^{-\xi/\mu} \bullet \frac{1}{\sqrt{2\pi}\sigma} e^{-\frac{y^2}{2\sigma^2}} \quad (6)$$

The flux contribution source area of LAS measurements was estimated by combining the footprint function  $w(x, y, z)$  for point flux measurement with the path-weighting function  $W(x)$  of LAS (Meijninger et al., 2002). For equal sized transmitter and receiver apertures, this path-weighting function is symmetrical bell-shaped having a center maximum and tapering to zero at the transmitter and receiver end. For the LAS footprint calculation, the approach of Korman and Meixner (2001) was still used for the single-point footprint estimation. The equation of the LAS footprint function is that:

$$f_{LAS} = \int_{x_2}^{x_1} W(x) \bullet w(x - x', y - y', z_{LAS}) dx \quad (7)$$

Where  $x_1, x_2$  are the positions of LAS receiver and transmitter, respectively.  $x, y$  represent the locations of points along the path of LAS.  $x', y'$  are the coordinates of each of upwind points.  $z_{LAS}$  is the effective height of LAS measurements.

To obtain averaged flux footprint of EC measurements (e.g. daily, monthly etc.), the flux-weighted

footprint climatology method was applied for each pixel (Liu et al., 2016). The expression of **the weighted footprint climatology** is shown in Eq. (8).

$$w_c(x, y, z) = \sum_i^N w_i(x, y, z) \bullet Flux(i) / \sum_i^N Flux(i) \quad (8)$$

Here  $i$  denotes the timestep (e.g. 30 min),  $N$  is the total number of 30-min periods within the **selected** time frame (**such as, daily scale**),  $Flux(i)$  is the **EC** observed flux at  $i$  time-step (**30-min ET in this case**),  $w_i(x, y, z)$  represents every half-hourly footprint **estimate** calculated **via** Eq. (6).

The inputs of the **analytical** footprint model mainly include the measurement height, wind direction, wind speed and the Obukhov length. **The values of these parameters can be easily derived from flux tower measurements.** The **daily-averaged flux footprint** of the EC **observations** was calculated by Eq. (8). Every **half-hour** flux **contribution** source area of LAS **measurements** was estimated via Eq. (7). **The flux contribution of the total source area was set to 90 % for both EC and LAS measurements.** The normalized **daily-averaged footprint of ECs** and half-hourly footprint estimates **of LASs** were **separately** overlaid with 1-m land cover map to determine the footprint-weighted **contribution of each land cover classes to the measured flux from EC and LAS systems.**

### 15 **3.3 Data processing flow of the determination of area-averaged fluxes**

The overall **data processing flow** for determining the area-averaged evapotranspiration over a heterogeneous land surface mainly includes three aspects (**Fig. 2**).

Firstly, the spatial representativeness of 16 EC sites within the  $5 \times 5 \text{ km}^2$  experimental area was quantitatively assessed by overlaying in-site flux footprint climatology with 1-m land cover map. Detailed analyses on this aspect are going to be presented in the following section.

The second aspect was to evaluate the reliability of the established flux aggregation scheme **through the area-averaged flux measured by LAS systems. Specifically speaking, based on footprint analysis and high-resolution land-cover map,** the land cover specific flux was firstly dis-aggregated

from multiple EC flux measurements by performing a multiple linear regression analysis (Eq. 5). To obtain area-averaged fluxes representative for LAS source area, the EC dis-aggregated fluxes for all land cover classes were aggregated again according to the fractional weight of each land cover class in the LAS footprint (Eq. 4). Finally, the EC-aggregated fluxes were compared with LAS observations.

At last, the area-averaged evapotranspiration over a heterogeneous land surface was estimated from multi-point EC flux measurements with the flux integration scheme that was developed and verified, as Eq. (1).

## 4 Results and Discussion

### 4.1 The characteristics of the surface heat and water vapor fluxes

Figure 3 depicts the diurnal cycle of the sensible (Fig. 3a) and latent (Fig. 3b) heat fluxes at different sites on two clear days. Both of the two figures not only reveal the energy exchange of different sites but also the significant differences in the magnitude of the sensible- and latent heat fluxes between different surface types during the growing season.

The sensible heat flux over residential area reached a maximum of about  $150 \text{ W m}^{-2}$  at afternoon and was higher than over the vegetated surfaces ( $H_{ec4}$ , Fig. 3a), while the latent heat flux was smaller compared with other sites, with maximum value of less than  $300 \text{ W m}^{-2}$  due to a certain fraction of sealed land surfaces ( $LE_{ec4}$ , Fig. 3b).

Over the vegetated surfaces (orchard, vegetable, maize), the sensible heat flux was nearly less than  $100 \text{ W m}^{-2}$  because of sufficient irrigation (Fig. 3a). The sensible heat flux over the three types of vegetation was also significantly different (Fig. 4a). There was also a difference in sensible heat fluxes among maize sites.

Deviations in latent heat fluxes over different vegetation types were also found (Fig. 3b, Fig. 4b). The maize fields performed highly latent heat fluxes and lower sensible heat fluxes than the other two vegetated surfaces. One of the possible reasons is that both of the orchard area and the vegetable field

are rather sparse compared with the maize cropland during the crop growing period. The sensible heat flux for maize field sites was relatively small and even negative (e.g. site 10) in the midafternoon (Fig. 3a) when the sensible heat was transported downward (known as the ‘oasis effect’). And the latent heat flux over maize cropland was quite large, with maximum value of up to  $600 \text{ W m}^{-2}$  (Fig. 3b).

5        The values of the standard deviation (SD) of LE and H for 13 maize sites were about  $43.3 \text{ W m}^{-2}$  and  $8.4 \text{ W m}^{-2}$ , respectively. The result showed that the latent heat flux over maize cropland exhibited larger SD than the sensible heat flux, and it also indicated the LE differed between sites for same underlying surface (Fig. 4). This can be partly explained by the discrepancy in plant physiology and vegetation growing stage.

10        The preliminary results indicated that the variability and difference in the surface energy fluxes between the HiWATER tower flux sites were really significant during the crop growth period. The differences in sensible and latent heat fluxes between maize field sites could be also noticed.

#### 4.2 Analysis of the representativeness of the multi-point EC flux measurements

15        To further understand the variability of surface energy fluxes between different sites in a heterogeneous landscape, the footprint analyses for representativeness of EC sites were performed by superimposing flux footprint with high resolution land-cover map (Fig. 1). The fraction of land cover classes present in the daily-averaged footprint of each EC measurements is given in Fig. 5. Given the source area (90 % flux contribution) of the 4 ECs (sites 5, 8, 13 and 16) on 30 June 2012 exceeded the extent of land cover map, the spatial representativeness of the 4 EC sites was not shown in Fig. 5b.

20        Due to the variations in the observation height, atmospheric stability, wind direction and wind speed, the exact shape and size of the EC source area were distinctly different (Fig. 1). For each EC flux measurements, there was more than one type of land cover in its footprint. The contribution of each land cover classes to the total measured flux was changed with the varying source area (Fig. 5).

The dominated surface types in the source area were vegetable and orchard at sites 1 and 17,

respectively. For site 4, however, there were mainly three types of land cover within its **source area**, namely non-vegetation, maize and woods type. The fractional weight of the non-vegetation type and maize field in the footprint greatly varied, while the proportion of woods was almost changeless.

At maize field sites, the relative contribution of maize field to the EC measured flux was approximately more than 0.9, except for sites 2, 9 and 10. At site 2, the percentage of non-vegetation type in the footprint was almost 0.18. For site 9, the rate of maize and non-vegetation type present in footprint significantly varied. The contribution of vegetable type to the flux measurements at site 10 ranged from 0.15 to 0.1.

The above analysis shows **that the tower flux measurements at the field scale are generally representative of multiple surface types**. The result indicates that the latent and sensible heat fluxes measured by EC systems are representative of the averaged fluxes, which are **determined by weighting** the upwind surface flux emanating from individual land cover classes with flux footprint. In general, it may be problematic to validate the model estimated fluxes by direct comparison with **point** flux measurements over a heterogeneous land surface. Thus, the extension of **multiple tower-based** flux observations to pixel/grid scale is **urgently needed for the validation of model estimates of surface flux**.

#### **4.3 Evaluation of the EC aggregated fluxes**

The determination of area-averaged fluxes from point measurements is usually not straightforward, especially for heterogeneous land surfaces. Based on multi-point EC flux measurements and accurate 1-m land cover map, a flux aggregation method **for obtaining area averaging of fluxes** was established with footprint analysis and multivariate regression. **Fig. 1** shows that all types of land covers present in the LAS **source area**, **therefore** the LAS measurements can be taken as reference to assess the feasibility of the developed integration scheme.

**The first step was to dis-aggregate the specific flux for all land cover classes from EC flux observations via the flux integration scheme.** The diurnal cycle of the EC dis-aggregated sensible heat

fluxes for each land cover types is highly significant (Fig. 6). Then, the EC dis-aggregated fluxes for four land-cover classes were aggregated again to obtain area-averaged fluxes. Fig. 7 illustrates a scatterplot of 30-min averaged sensible heat fluxes estimated from EC flux matrix (hereafter referred as H\_ECagg) versus LAS measurements (H\_LAS), as well as the linear regression parameters (including equations and R<sup>2</sup>). The different statistics between H\_ECagg and H\_LAS are listed in Table 3.

For LAS 1 (see Fig. 7a and Table 3), a good agreement is found between EC aggregated fluxes and LAS measurements, with high correlation coefficient and low RMSE value (R<sup>2</sup>= 0.79, RMSE= 0.96 W m<sup>-2</sup>). The scatter points in the graph are nearly close to the 1:1 line. The MBE and MAPE values were 4.25 W m<sup>-2</sup> and 9.93 %, respectively.

Compared with LAS 1, there was a little scatter between LAS measured fluxes and estimates from multiple EC flux observations for LAS 2, but yielding a small mean bias error (MBE = 2.31 W m<sup>-2</sup>) (Fig. 7b, Table 3). RMSE and MAPE values of LAS 2 were little higher than of LAS 1, with values of 6.91 W m<sup>-2</sup> and 16.39 %, respectively. Slight part of urban areas distributed in the path of LAS 2 (Fig. 1).

For LAS 3 (Fig. 7c, Table 3), there was a slightly weak relationship between sensible heat fluxes derived from LAS and multi-point EC flux observations, with correlation coefficient (R<sup>2</sup>) of 0.57 and RMSE, MAPE as well as MBE values of 17.63 W m<sup>-2</sup>, 31.7 % and -18.01 W m<sup>-2</sup>, respectively. The negative value of MBE indicates that the 30-min area-averaged sensible heat fluxes aggregated from EC flux measurements were quite underestimated against the H of LAS 2. As shown in Fig. 7c, the scatter points were overall below the 1:1 line. There is more large area of residential areas randomly distributing in the central path of LAS 3 than other three LAS systems (Fig. 1).

In Fig. 7d, the area-averaged sensible heat fluxes obtained using the flux aggregation method were consistent with LAS measurements, with R<sup>2</sup> of 0.57 for LAS 4. In contrast with LAS 3, the scatter points in this graph were almost above the 1:1 line (overestimate of EC estimated H, MBE > 10 W m<sup>-2</sup>). RMSE value of LAS 4 relatively decreased by 4.88 W m<sup>-2</sup>, but MAPE value was up to 33.7 % (Table 3).

Large proportion of area in the LAS 4 source area was occupied by woods and vegetable types as well



as urban area (Fig. 1), which to a large extent ranged with the variation of wind direction.

The above findings show, above the more homogeneous areas, there is a good agreement between EC aggregated fluxes and LAS measurements, while great discrepancy between them occurred in the more urban areas. For the maize dominated areas, the unclosure of the energy balance is surely low, but this is not the case for the more urban area and the orchard site. The EBR for site 4 and site 17 over heterogeneous areas exhibited low values. This may be the one factor attributing to the bias.

The energy balance closure of the HiWATER flux dataset was influenced by surface heterogeneity, which may result in large eddies or organized circulation structures (Xu et al., 2017). The energy flux from large eddies or secondary circulations cannot be captured by single-point EC measurements but be measured via LAS system (Foken, 2008;Foken et al., 2010). Thus, the LAS observations might be able to close to the surface energy balance better than the EC method (Foken et al. 2010).

In the study, only three stations had another dominant land cover (site 1, 4 and 17). Especially for urban area that occupied much more part of the area, the sensible heat flux for non-vegetation type disaggregated from site 4 might be insufficient representative for the flux from sealed buildings and roads that are part of non-vegetation type. The divergence between modeled and measured flux may partly be attributed to this deficit.

Overall, the above results demonstrate that, compared with the area-averaged fluxes measured by LAS systems, the area-averaged fluxes that are aggregated from multiple EC flux measurements using the established flux aggregation method are reliable. Therefore, the developed flux integration schemes in this study can be an effective way to estimate the area averaging of fluxes.

#### 4.4 Estimation of area-averaged evapotranspiration

The flux aggregation scheme, which was established and evaluated in Sect. 4.3, was adopted to determine the area-averaged ET over the study area with multi-point EC flux measurements and high resolution land-cover map. The EC dis-aggregated daily ET for all land cover types over two clear days

was shown in Fig. 8. As can be seen, the daily ET values for maize field were highest (7 mm – 8 mm) during the crop growing season. The value of daily ET was 6.4 mm for woods type, and it ranged from 6 mm to 7 mm for vegetable field. On the contrary, the daily ET for non-vegetation type varied largely, with values of 2.8 mm on 29 June and 1.5 mm on 30 June, respectively.

5        The daily ET maps at 1-m resolution were produced through the dis-aggregated daily ET for all land cover classes, combined with the 1-m land classification map. Fig. 9 depicts the spatial pattern of daily ET on 29 and 30 June 2012. It can be seen from the legend in figure, the daily ET ranged from 1.56 to 7.95 mm during the two days, with higher values on 29 June (Fig. 9a) than on 30 June (Fig. 9b).

Table 4 lists the total ET for different land cover classes and their proportion of the total area ET.  
10       The total ET for our study area was almost 169620 m<sup>3</sup> per day on 29 June, while it was about 152940 m<sup>3</sup> per day on 30 June. The results demonstrated that the ratio of ET for maize field to the total area ET was in excess of 80 %. In addition, the total rate of ET for both woods and vegetables types was approximately 13 %, and the ET value for non-vegetation type accounted for 4.83 % of daily totals on the average.

15       Finally, the area-averaged ET over the kernel experimental area of HiWATER was estimated, with values of approximately 7.01 mm day<sup>-1</sup> on 29 June and 6.32 mm day<sup>-1</sup> on 30 June 2012.

## 5 Summary and conclusions

On the basis of 1-m accurate land cover map and multi-point ground-based flux measurements from 16 EC systems and 4 groups of LAS systems during the intensive observation period of HiWATER  
20       program, the area-averaged surface fluxes over a heterogeneous surface were determined using a flux aggregation method, which was established through the integration of footprint analysis and multiple linear regression, and compared with the LAS measurements to assess the reliability of the flux integration method. Ultimately, the integration method was applied to estimate area-averaged ET over the study area.

Robust quality-control and uncertainty-estimation for the EC and LAS data, done through careful data-processing and inter-comparison as well as assessment of the energy balance closure, make sure the accuracy of the flux dataset used in data analysis. Moreover, the combination of footprint analyses for the representativeness of EC flux measurements and high-resolution land cover map can be a practical way for the deep interpretation of the surface fluxes over different land surfaces, and it is also the foundation for the establishment of the flux aggregation algorithm.

With high-quality flux dataset (EC & LAS), precise flux footprint estimates and accurate land cover classification map, a flux aggregation method can be successfully established by multivariate regression, and it achieves the goal of determining the area-averaged fluxes over heterogeneous areas from the EC flux matrix, according to the LAS measured fluxes. However, the agreement between the results of the flux integration method and the measurements of LAS systems partly relates to the heterogeneity of land surface resulting in the energy imbalance in EC measurements and may partly attribute to the insufficient distribution of flux stations under urban areas.

In spite of the limitations mentioned above, the current flux integration scheme provides a unique opportunity to disentangle the heterogeneous land surface fluxes in their single components, and the dis-aggregation process has the potential to scale up multiple EC measurements to an oasis landscape, even to a whole river basin. Besides, compared with the formerly used and rather simple approaches (e.g. the arithmetic average and area-weighted methods), present scheme is not only with a much better database but also has a solid grounding in physics and mathematics in the integration of area-averaged fluxes over a heterogeneous surface. Results from this study, such as daily ET at the satellite pixel scale, can be applied for the validation of flux estimates of meso- $\gamma$  scale (1 ~ 20 km) models. Furthermore, this work will be extended to the water balance study of the whole Heihe River basin, which is quite interested for hydrological modeling and basin water resource management.

## **Data availability**

The flux observation matrix datasets from the eddy covariance (EC) systems and large aperture scintillometer (LAS) systems and the meteorological data in this study are available at <http://card.westgis.ac.cn/hiwater/mso> on request. The revised 1-m land cover data for this paper are available from the corresponding author on request.

## 5 Competing interests

The authors declare that they have no conflict of interest.

*Acknowledgements.* This study was supported by the National Natural Science Foundation of China (Grant number: 41271359; **41671373**), the Key Project of National Natural Science Foundation of  
10 China (Grant number: 41301363).

## References

- Anderson, M. C., Kustas, W. P., Alfieri, J. G., Gao, F., Hain, C., Prueger, J. H., Evett, S., Colaizzi, P., Howell, T., and Chávez, J. L.: Mapping daily evapotranspiration at Landsat spatial scales during the BEAREX'08 field campaign, *Advances in Water Resources*, 50, 162-177, 2012.
- 15 André J.-C., Goutorbe, J.-P., and Perrier, A.: HAPEX-MOBLIH: A Hydrologic Atmospheric Experiment for the Study of Water Budget and Evaporation Flux at the Climatic Scale, *Bulletin of the American Meteorological Society*, 67, 138-144, 1986.
- Andreas, E. L.: Estimating  $C_n^2$  over snow and sea ice from meteorological data, *JOSA A*, 5, 481-495, 1988.**
- Beyrich, F., Leps, J.-P., Mauder, M., Bange, J., Foken, T., Huneke, S., Lohse, H., Lüdi, A., Meijninger, W. M., and Mironov, D.: Area-averaged surface fluxes over the LITFASS region based on eddy-covariance measurements, *Boundary-layer meteorology*, 121, 33-65, 2006.
- 20 Beyrich, F., and Mengelkamp, H.-T.: Evaporation over a heterogeneous land surface: EVA\_GRIPS and the LITFASS-2003 experiment—an overview, *Boundary-layer meteorology*, 121, 5-32, 2006.
- Blanken, P.: Turbulent flux measurements above and below the overstory of a boreal aspen forest, *Boundary-Layer Meteorology*, 89, 109-140, 1998.
- 25 **Charuchittipan, D., Babel, W., Mauder, M., Leps, J. P., and Foken, T.: Extension of the Averaging Time in Eddy-Covariance Measurements and Its Effect on the Energy Balance Closure, *Boundary-Layer Meteorology*, 152, 303-327, 2014.**
- Chen, B., Black, T. A., Coops, N. C., Hilker, T., Trofymow, J. A., and Morgenstern, K.: Assessing Tower Flux Footprint Climatology and Scaling Between Remotely Sensed and Eddy Covariance Measurements, *Boundary-Layer Meteorology*, 130, 137-167, 10.1007/s10546-008-9339-1, 2008.
- 30 Ezzahar, J., and Chehbouni, A.: The use of scintillometry for validating aggregation schemes over heterogeneous grids, *Agric.*

- For. Meteorol., 149, 2098-2109, 2009.
- Ezzahar, J., Chehbouni, A., Er-Raki, S., and Hanich, L.: Combining a large aperture scintillometer and estimates of available energy to derive evapotranspiration over several agricultural fields in a semi-arid region, *Plant Biosystems - An International Journal Dealing with all Aspects of Plant Biology*, 143, 209-221, 10.1080/11263500802710036, 2009a.
- 5 Ezzahar, J., Chehbouni, A., Hoedjes, J., Ramier, D., Boulain, N., Boubkraoui, S., Cappelaere, B., Descroix, L., Mougenot, B., and Timouk, F.: Combining scintillometer measurements and an aggregation scheme to estimate area-averaged latent heat flux during the AMMA experiment, *Journal of hydrology*, 375, 217-226, 2009b.
- Foken, T., Wimmer, F., Mauder, M., Thomas, C., and Liebethal, C.: Some aspects of the energy balance closure problem, *Atmospheric Chemistry and Physics*, 6, 4395-4402, 2006.
- 10 Foken, T.: The energy balance closure problem: An overview, *Ecological Applications*, 18, 1351-1367, 2008.
- Foken, T., Mauder, M., Liebethal, C., Wimmer, F., Beyrich, F., Leps, J.-P., Raasch, S., DeBruin, H. A., Meijninger, W. M., and Bange, J.: Energy balance closure for the LITFASS-2003 experiment, *Theoretical and Applied Climatology*, 101, 149-160, 2010.
- Goutorbe, J., Lebel, T., Tinga, A., Bessemoulin, P., Brouwer, J., Dolman, A., Engman, E., Gash, J., Hoepffner, M., and Kabat, 15 P.: HAPEX-Sahel: a large-scale study of land-atmosphere interactions in the semi-arid tropics, *Annales Geophysicae*, 12, 53-64, 1994.
- Halldin, S., Gottschalk, L., van de Griend, A. A., Gryning, S.-E., Heikinheimo, M., Högström, U., Jochum, A., and Lundin, L.-C.: NOPEX—a northern hemisphere climate processes land surface experiment, *Journal of Hydrology*, 212, 172-187, 1998.
- 20 Horst, T., and Weil, J.: Footprint estimation for scalar flux measurements in the atmospheric surface layer, *Boundary-Layer Meteorology*, 59, 279-296, 1992.
- Hutjes, R., Vellinga, O., Gioli, B., and Miglietta, F.: Dis-aggregation of airborne flux measurements using footprint analysis, *Agric. For. Meteorol.*, 150, 966-983, 2010.
- Jia, Z., Liu, S., Xu, Z., Chen, Y., and Zhu, M.: Validation of remotely sensed evapotranspiration over the Hai River Basin, 25 China, *Journal of Geophysical Research: Atmospheres*, 117, D13113, doi:10.1029/2011JD017037., 2012.
- Kim, J., Guo, Q., Baldocchi, D., Leclerc, M., Xu, L., and Schmid, H.: Upscaling fluxes from tower to landscape: Overlaying flux footprints on high-resolution (IKONOS) images of vegetation cover, *Agric. For. Meteorol.*, 136, 132-146, 2006.
- Kirby, S., Dobosy, R., Williamson, D., and Dumas, E.: An aircraft-based data analysis method for discerning individual fluxes in a heterogeneous agricultural landscape, *Agric. For. Meteorol.*, 148, 481-489, 2008.
- 30 Kljun, N., Rotach, M., and Schmid, H.: A three-dimensional backward Lagrangian footprint model for a wide range of boundary-layer stratifications, *Boundary-Layer Meteorology*, 103, 205-226, 2002.
- Kljun, N., Calanca, P., Rotach, M., and Schmid, H.: A simple two-dimensional parameterisation for Flux Footprint Prediction (FFP), *Geoscientific Model Development*, 8, 3695-3713, 2015.
- Kormann, R., and Meixner, F. X.: An analytical footprint model for non-neutral stratification, *Boundary-Layer Meteorology*, 35 99, 207-224, 2001.
- Leclerc, M. Y., and Foken, T.: *Footprints in Micrometeorology and Ecology*, Springer, Heidelberg, New York, Dordrecht, London, XIX, 239 pp., 2014.

- Li, X., Cheng, G., Liu, S., Xiao, Q., Ma, M., Jin, R., Che, T., Liu, Q., Wang, W., Qi, Y., Wen, J., Li, H., Zhu, G., Guo, J., Ran, Y., Wang, S., Zhu, Z., Zhou, J., Hu, X., and Xu, Z.: Heihe Watershed Allied Telemetry Experimental Research (HiWATER): Scientific Objectives and Experimental Design, *Bulletin of the American Meteorological Society*, 94, 1145-1160, 10.1175/bams-d-12-00154.1, 2013.
- 5 Liu, S., Xu, Z., Wang, W., Jia, Z., Zhu, M., Bai, J., and Wang, J.: A comparison of eddy-covariance and large aperture scintillometer measurements with respect to the energy balance closure problem, *Hydrology & Earth System Sciences*, 15, 1291-1306, 2011.
- Liu, S., Xu, Z., Song, L., Zhao, Q., Ge, Y., Xu, T., Ma, Y., Zhu, Z., Jia, Z., and Zhang, F.: Upscaling evapotranspiration measurements from multi-site to the satellite pixel scale over heterogeneous land surfaces, *Agric. For. Meteorol.*, 230, 97-113 2016.
- 10 Liu, X., and Bo, Y.: Object-Based Crop Species Classification Based on the Combination of Airborne Hyperspectral Images and LiDAR Data, *Remote Sens.*, 7, 922-950, 2015.
- Mahrt, L., Vickers, D., Sun, J., and McCaughey, J. H.: Calculation of area-averaged fluxes: Application to BOREAS, *Journal of applied meteorology*, 40, 915-920, 2001.
- 15 Martano, P.: Estimation of surface roughness length and displacement height from single-level sonic anemometer data, *Journal of Applied Meteorology*, 39, 708-715, 2000.
- Mauder, M., and Foken, T.: Documentation and instruction manual of the eddy covariance software package TK3 (update), *Arbeitsergebnisse, Universität Bayreuth, Abt. Mikrometeorologie (ISSN 1614-8916)*, 62, 64 pp, 2015.
- Meijninger, W., Hartogensis, O., Kohsiek, W., Hoedjes, J., Zuurbier, R., and De Bruin, H.: Determination of area-averaged sensible heat fluxes with a large aperture scintillometer over a heterogeneous surface–Flevoland field experiment, *Boundary-Layer Meteorology*, 105, 37-62, 2002.
- 20 Mengelkamp, H.-T., Beyrich, F., Heinemann, G., and Ament, F., Bange, J., Berger, F. H., Bösenberg, J., Foken, T., Hennemuth, B., Heret, C., Huneke, S., Johnsen, K.-P., Kerschgens, M., Kohsiek, W., Leps, J.-P., Liebethal, C., Lohse, H., Mauder, M., Meijninger, W. M. L., Raasch, S., Simmer, C., Spieß, T., Tittelbrand, A., Uhlenbrook, S., and Zittel, P.: Evaporation over a heterogeneous land surface: the EVA-GRIPS project, *Bulletin of the American Meteorological Society*, 87, 775-786, 2006.
- 25 Ochs, G., and Wilson, J.: A Second-generation Large-aperture Scintillometer, US Department of Commerce, National Oceanic and Atmospheric Administration, Environmental Research Laboratories, Wave Propagation Laboratory, 1993.
- Ogunjemiyo, S. O., Kaharabata, S. K., Schuepp, P. H., MacPherson, I. J., Desjardins, R. L., and Roberts, D. A.: Methods of estimating CO<sub>2</sub>, latent heat and sensible heat fluxes from estimates of land cover fractions in the flux footprint, *Agric. For. Meteorol.*, 117, 125-144, 2003.
- 30 Ran, Y., Li, X., Sun, R., Kljun, N., Zhang, L., Wang, X., and Zhu, G.: Spatial representativeness and uncertainty of eddy covariance carbon flux measurements for upscaling net ecosystem productivity to the grid scale, *Agric. For. Meteorol.*, 230, 114-127, 2016.
- 35 Schmid, H. P.: Footprint modeling for vegetation atmosphere exchange studies: a review and perspective, *Agric. For. Meteorol.*, 113, 159-183, 2002.
- Sellers, P., Hall, F., Asrar, G., Strebel, D., and Murphy, R.: The first ISLSCP field experiment (FIFE), *Bulletin of the*

- American Meteorological Society, 69, 22-27, 1988.
- Sellers, P., Hall, F., Ranson, K. J., Margolis, H., Kelly, B., Baldocchi, D., den Hartog, G., Cihlar, J., Ryan, M. G., and Goodison, B.: The boreal ecosystem-atmosphere study (BOREAS): an overview and early results from the 1994 field year, *Bulletin of the American Meteorological Society*, 76, 1549-1577, 1995.
- 5 Wang, J.: Land surface process experiments and interaction study in China: From HEIFE to IMGRASS and GAME-Tibet/TIPEX, *Plateau Meteorol*, 18, 280-294, 1999.
- Wang, J., Gao, F., and Liu, S.: Remote sensing retrieval of evapotranspiration over the scale of drainage basin, *Remote Sensing Technology and Application*, 18, 332-338, 2003.
- Wang, J., Zhuang, J., Wang, W., Liu, S., and Xu, Z.: Assessment of Uncertainties in Eddy Covariance Flux Measurement Based on Intensive Flux Matrix of HiWATER-MUSOEXE, *IEEE Geoscience and Remote Sensing Letters*, 12, 259-263, 10 2015.
- Xu, Z., Liu, S., Li, X., Shi, S., Wang, J., Zhu, Z., Xu, T., Wang, W., and Ma, M.: Intercomparison of surface energy flux measurement systems used during the HiWATER-MUSOEXE, *Journal of Geophysical Research: Atmospheres*, 118, 13140-13157, 2013.
- 15 Xu, Z., Ma, Y., Liu, S., Shi, W., and Wang, J.: Assessment of the Energy balance closure under advective conditions and its impact using remote sensing data, *Journal of Applied Meteorology and Climatology*, 56, 127-140, 2017.

**Table 1** Details of the eddy covariance systems in the HiWATER flux matrix

| Site No. | Longitude (°) | Latitude (°) | Elevation (m) | Turbulence sensors | Sensor height (m)      | Surface type     |
|----------|---------------|--------------|---------------|--------------------|------------------------|------------------|
| 1        | 100.3582      | 38.8932      | 1552.75       | Gill/Li7500A       | 3.8                    | Vegetables       |
| 2        | 100.35406     | 38.88695     | 1559.09       | CSAT3/Li7500       | 3.7                    | Maize            |
| 3        | 100.37634     | 38.89053     | 1543.05       | Gill/Li7500A       | 3.8                    | Maize            |
| 4        | 100.35753     | 38.87752     | 1561.87       | CSAT3/Li7500A      | 4.2/ 6.2 after 19 Aug. | Residential area |
| 5        | 100.35068     | 38.87574     | 1567.65       | CSAT3/Li7500       | 3.0                    | Maize            |
| 6        | 100.3597      | 38.87116     | 1562.97       | CSAT3/Li7500A      | 4.6                    | Maize            |
| 7        | 100.36521     | 38.87676     | 1556.39       | CSAT3/Li7500A      | 3.8                    | Maize            |
| 8        | 100.37649     | 38.87254     | 1550.06       | CSAT3/Li7500       | 3.2                    | Maize            |
| 9        | 100.38546     | 38.87239     | 1543.34       | Gill/Li7500A       | 3.9                    | Maize            |
| 10       | 100.39572     | 38.87567     | 1534.73       | CSAT3/Li7500       | 4.8                    | Maize            |
| 11       | 100.34197     | 38.86991     | 1575.65       | CSAT3/Li7500       | 3.5                    | Maize            |
| 12       | 100.36631     | 38.86515     | 1559.25       | CSAT3/Li7500       | 3.5                    | Maize            |
| 13       | 100.37841     | 38.86076     | 1550.73       | CSAT3/Li7500A      | 5.0                    | Maize            |
| 14       | 100.3531      | 38.85867     | 1570.23       | CSAT3/Li7500       | 4.6                    | Maize            |
| 15       | 100.37223     | 38.85555     | 1556.06       | CSAT3/Li7500A      | 4.5/ 34                | Maize            |
| 16       | 100.36411     | 38.84931     | 1564.31       | Gill/Li7500        | 4.9                    | Maize            |
| 17       | 100.36972     | 38.8451      | 1559.63       | CSAT3/EC150        | 7.0                    | Orchard          |



**Table 2** Details of the Large Aperture Scintillometers in the HiWATER flux matrix

| Site  | Longitude ( °)  | Latitude ( °) | LAS type, Manufactures      | Path length(m) | Effective height (m) |
|-------|-----------------|---------------|-----------------------------|----------------|----------------------|
| LAS 1 | North 100.35090 | 38.88413      | BLS900, Scintec, Germany    | 3256           | 33.45                |
|       | South 100.35285 | 38.85470      | RR9340, Rainroot, China     | 3256           | 33.45                |
| LAS 2 | North 100.36236 | 38.88256      | BLS900, Scintec, Germany    | 2841           | 33.45                |
|       | South 100.36171 | 38.85717      | BLS450, Scintec, Germany    | 2841           | 33.45                |
| LAS 3 | North 100.37319 | 38.88338      | BLS900, Scintec, Germany    | 3111           | 33.45                |
|       | South 100.37223 | 38.85555      | LAS, Kipp&zonen, Netherland | 3111           | 33.45                |
| LAS 4 | North 100.37841 | 38.86076      | BLS450, Scintec, Germany    | 1854           | 22.45                |
|       | South 100.36840 | 38.84682      | RR9340, Rainroot, China     | 1854           | 22.45                |

**Table 3** Different statistics between LAS observed flux and EC aggregated flux at LAS sites

| LAS sites | RMSE [W m <sup>-2</sup> ] | MBE [W m <sup>-2</sup> ] | MAPE [%] |
|-----------|---------------------------|--------------------------|----------|
| LAS1      | 0.96                      | 4.25                     | 9.93     |
| LAS2      | 6.91                      | 2.31                     | 16.39    |
| LAS3      | 17.63                     | -18.01                   | 31.70    |
| LAS4      | 12.75                     | 10.66                    | 33.70    |

Remarks:  $RMSE = \sqrt{\sum_{i=1}^n (P_i - O_i)^2 / n}$ ,  $MAPE = \frac{100}{n} \sum_{i=1}^n \frac{|P_i - O_i|}{\bar{O}}$ ,  $MBE = \sum_{i=1}^n (P_i - O_i) / n$ ,  $P_i$  is EC aggregated value,  $O_i$  is LAS observed value,  $\bar{O}$  is the mean measured value,  $n$  is the number of samples. RMSE is root mean square error, MAPE is mean absolute percentage error, MBE is the mean bias error.

**Table 4** ET for each land cover classes and their proportion of the kernel experimental area ET

| Land cover class | Area<br>[km <sup>2</sup> ] | 2012/06/29                                          |                                  | 2012/06/30                                          |                                  |
|------------------|----------------------------|-----------------------------------------------------|----------------------------------|-----------------------------------------------------|----------------------------------|
|                  |                            | ET [ $\times 10^3$ m <sup>3</sup> d <sup>-1</sup> ] | ET proportion<br>of total ET [%] | ET [ $\times 10^3$ m <sup>3</sup> d <sup>-1</sup> ] | ET proportion<br>of total ET [%] |
| Maize            | 17.42                      | 138.43                                              | 81.61                            | 127.24                                              | 83.20                            |
| Woods            | 1.96                       | 12.78                                               | 7.53                             | 12.59                                               | 8.23                             |
| Vegetables       | 1.20                       | 8.27                                                | 4.88                             | 7.48                                                | 4.89                             |
| Non-vegetation   | 3.62                       | 10.14                                               | 5.98                             | 5.63                                                | 3.68                             |

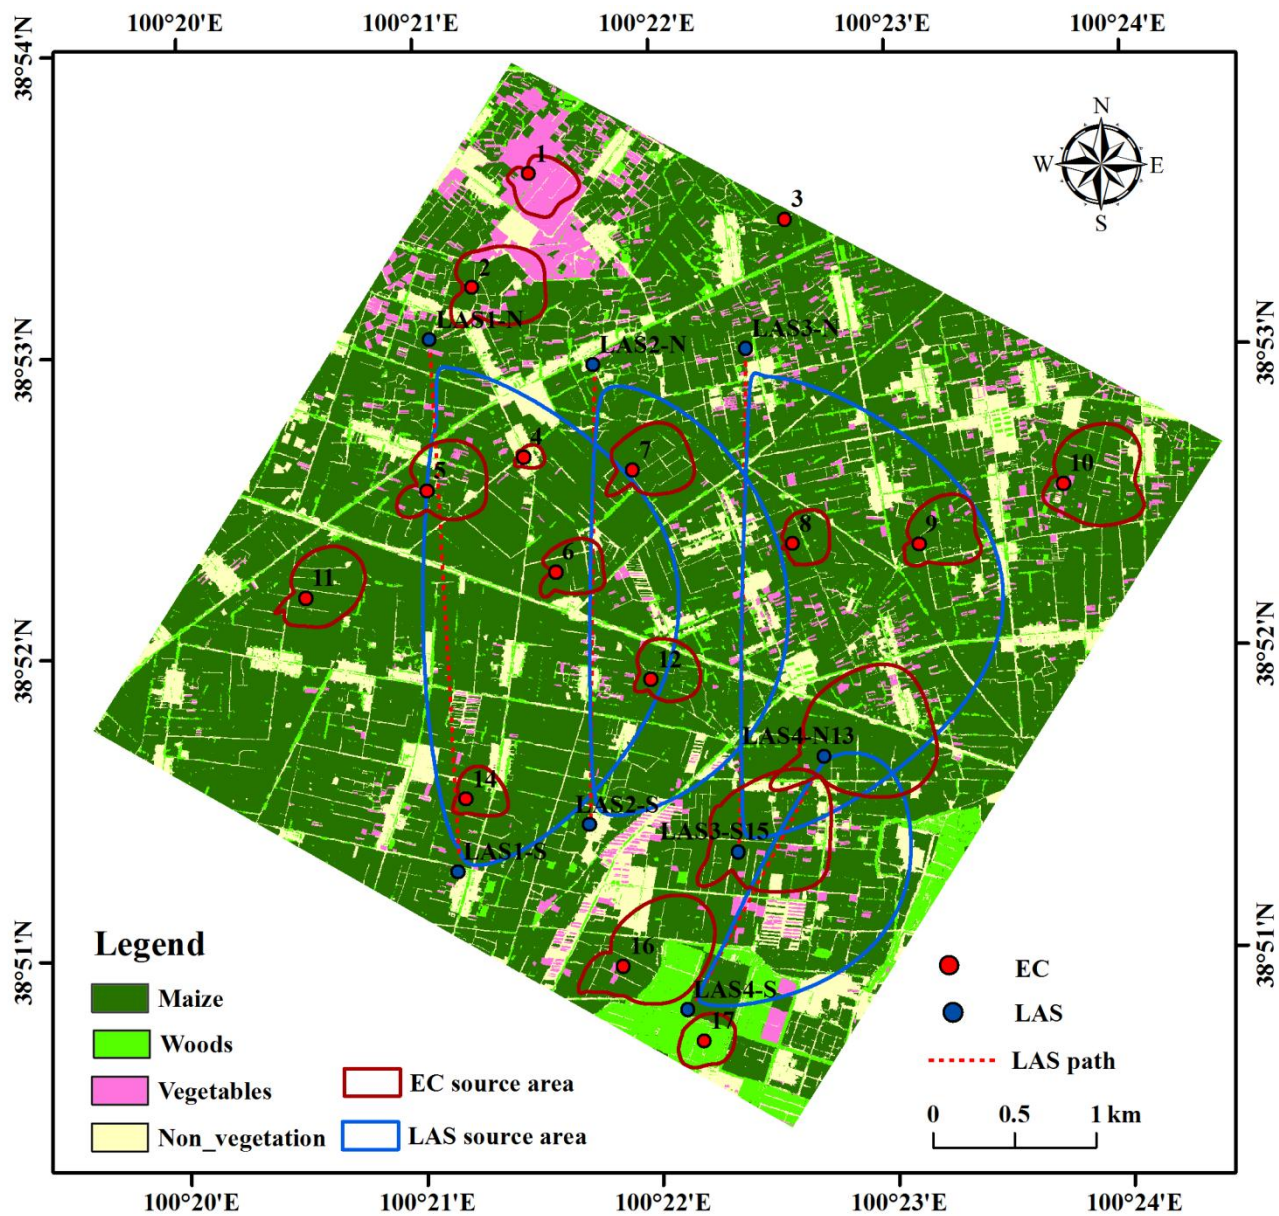

**Fig. 1** The land cover map of the kernel experiment area of HiWATER 2012. The small red circles represent the 90 % flux contribution source area of EC sites, and the large blue circles covering different land cover classes indicate the source area of LAS sites on 29 June 2012

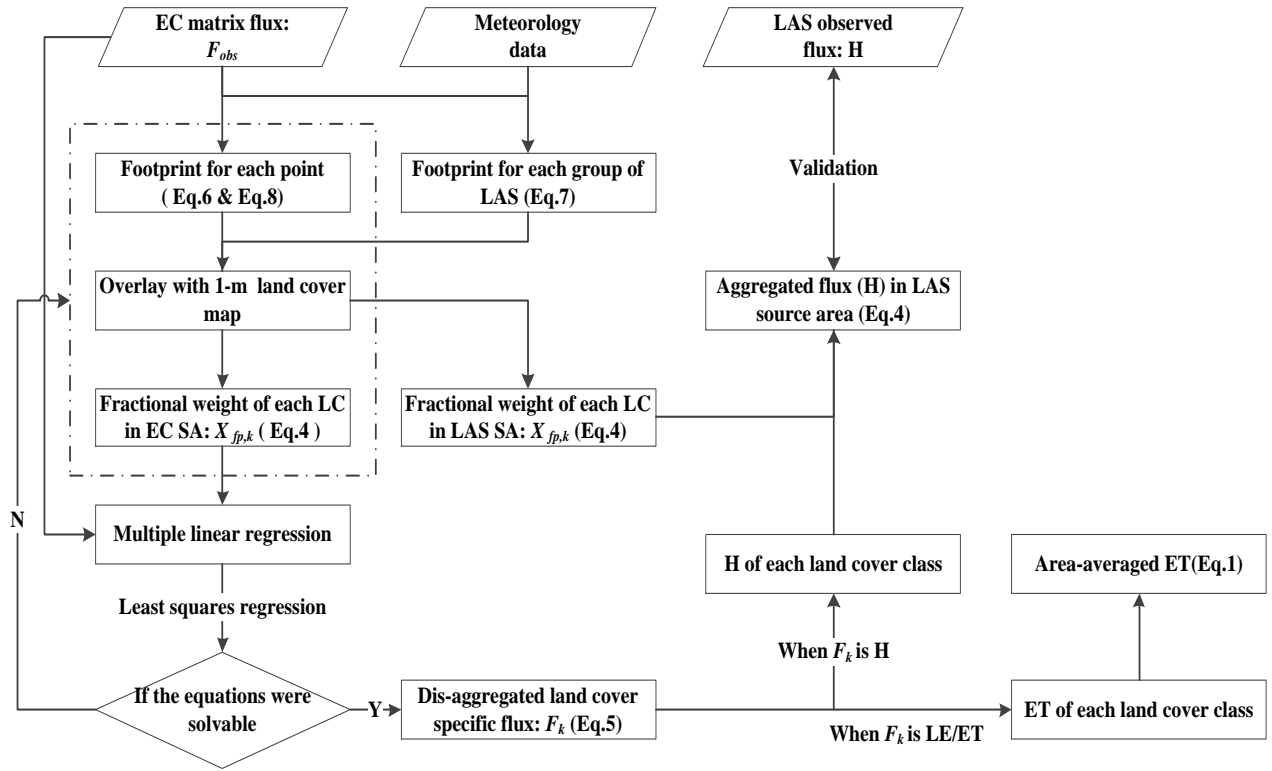

**Fig. 2** Schematic illustration of data processing steps; LC = land cover class; SA = source area; H = sensible heat flux; LE = latent heat flux; ET = evapotranspiration

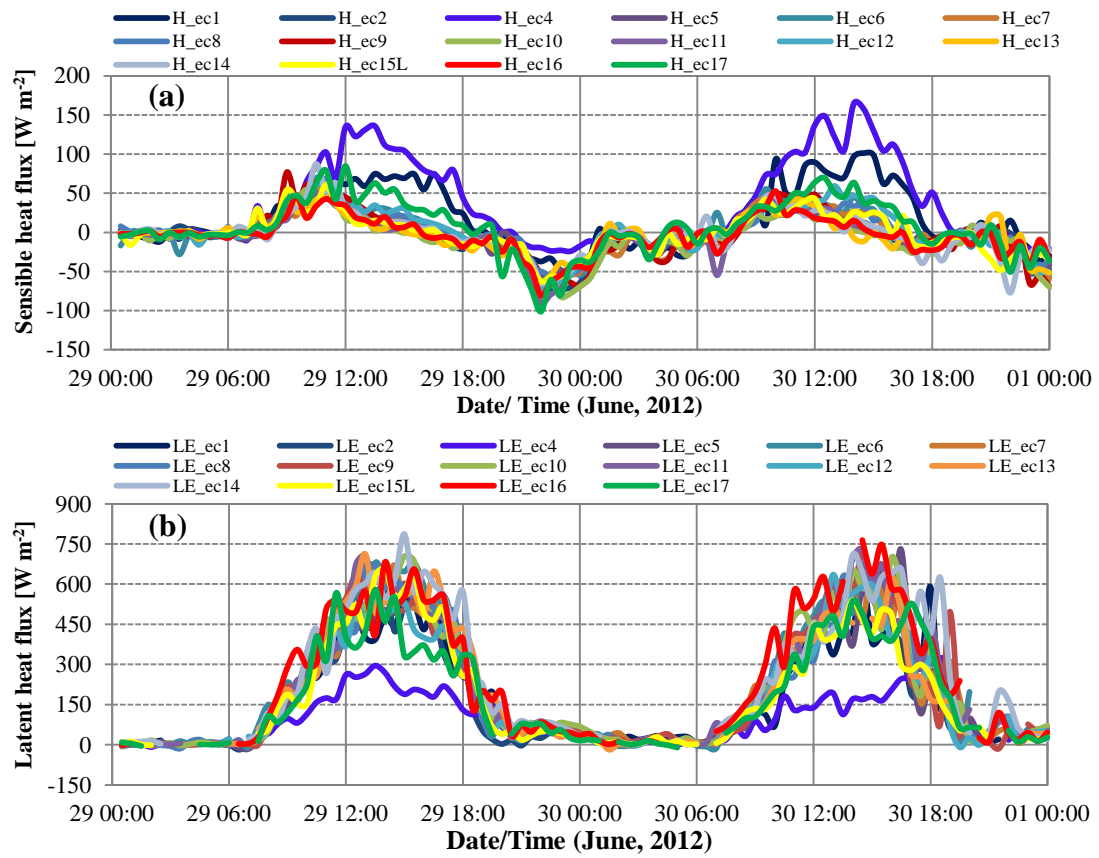

**Fig. 3** Diurnal cycle of the sensible heat fluxes (a) and latent heat fluxes (b) between different sites on 29 and 30 June 2012

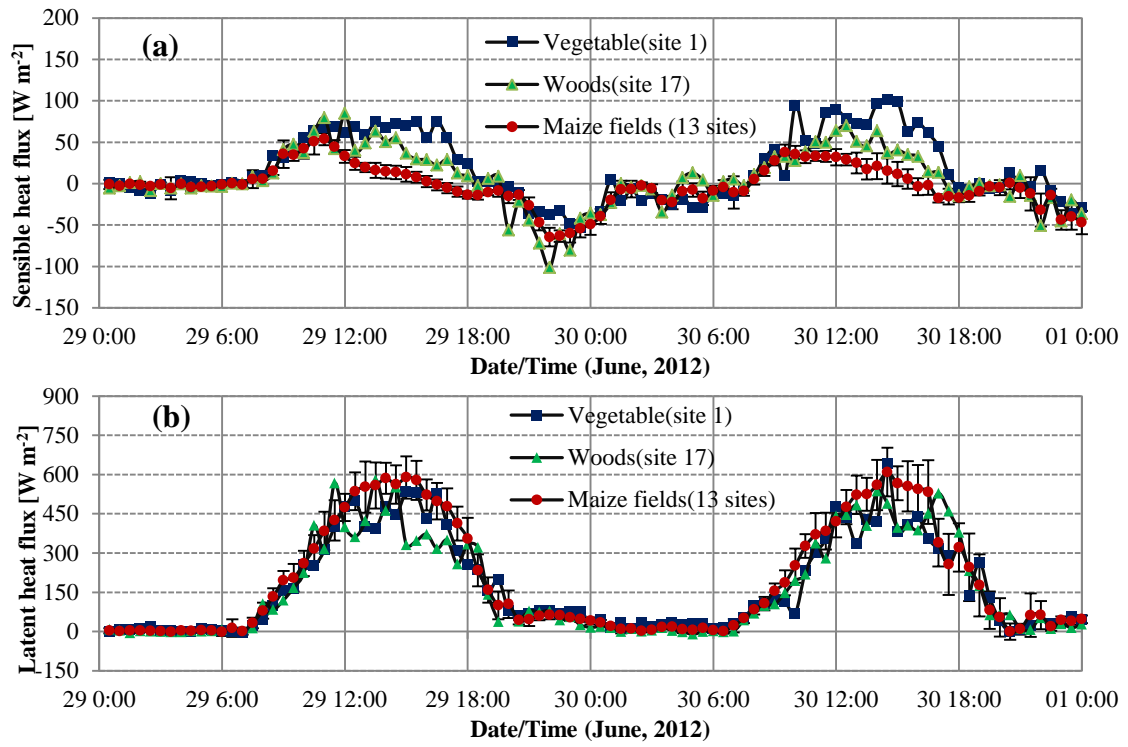

**Fig. 4** Diurnal cycle of the mean sensible (a) and latent (b) heat fluxes for 13 maize field sites and different types of vegetation, the errors bars are the standard deviation

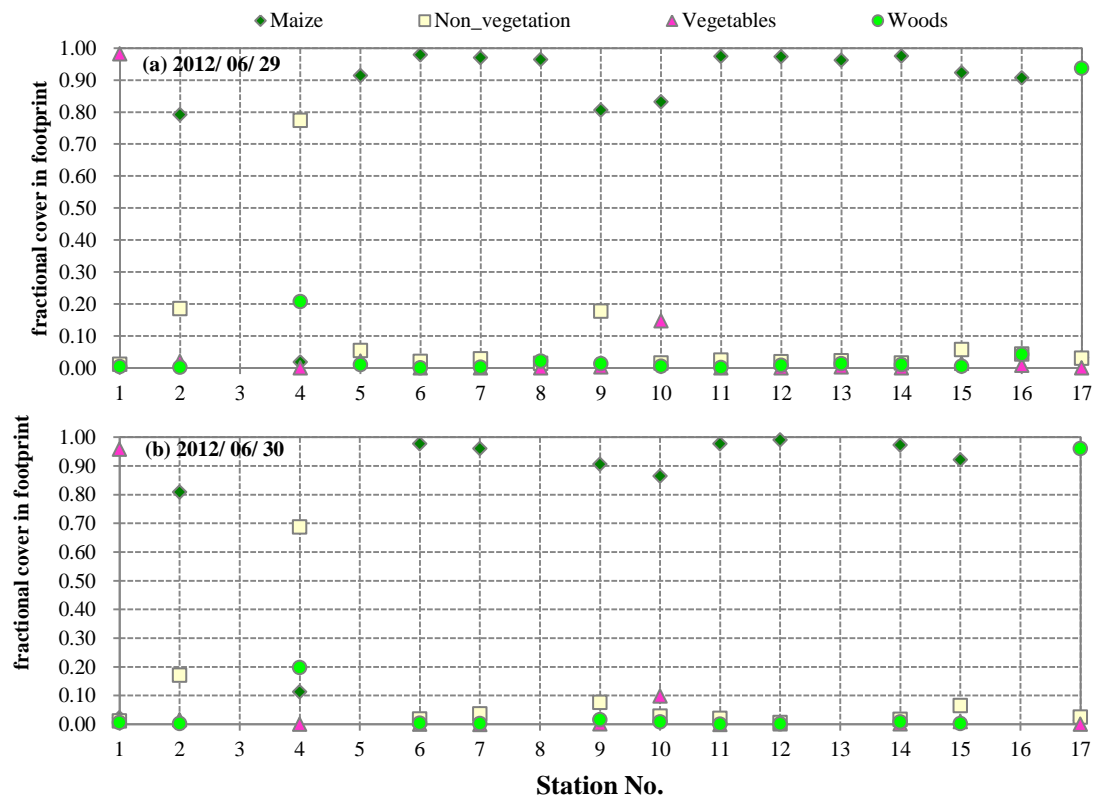

**Fig. 5** The fractional weight of each land cover classes in the daily averaged flux footprint of each EC flux measurements on 29 and 30 June 2012



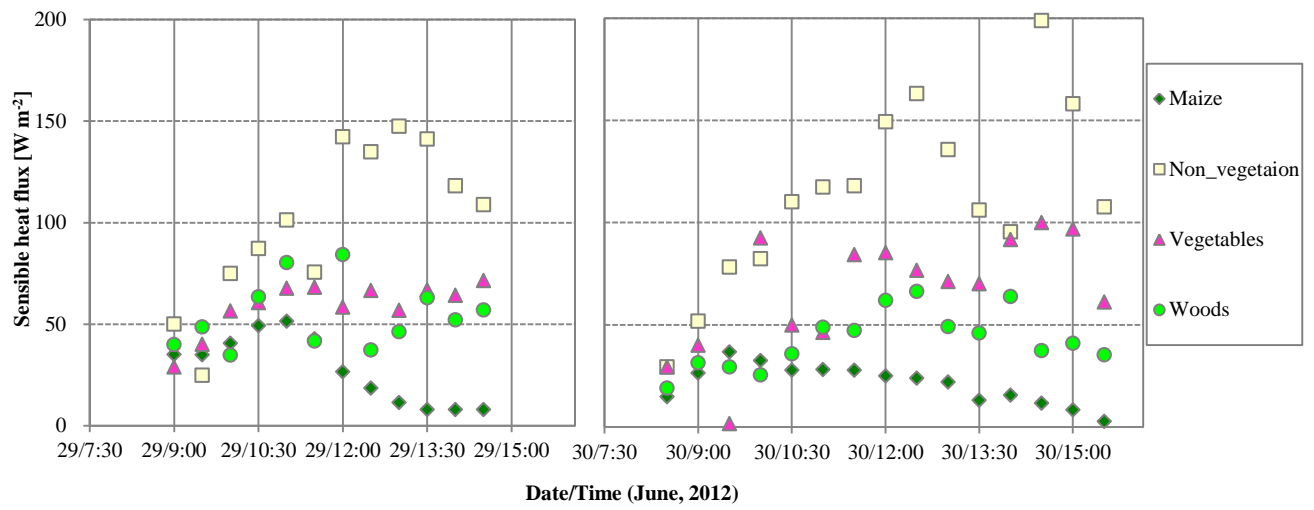

**Fig. 6** The diurnal cycle of the sensible heat flux for each land cover classes on 29 and 30 June 2012

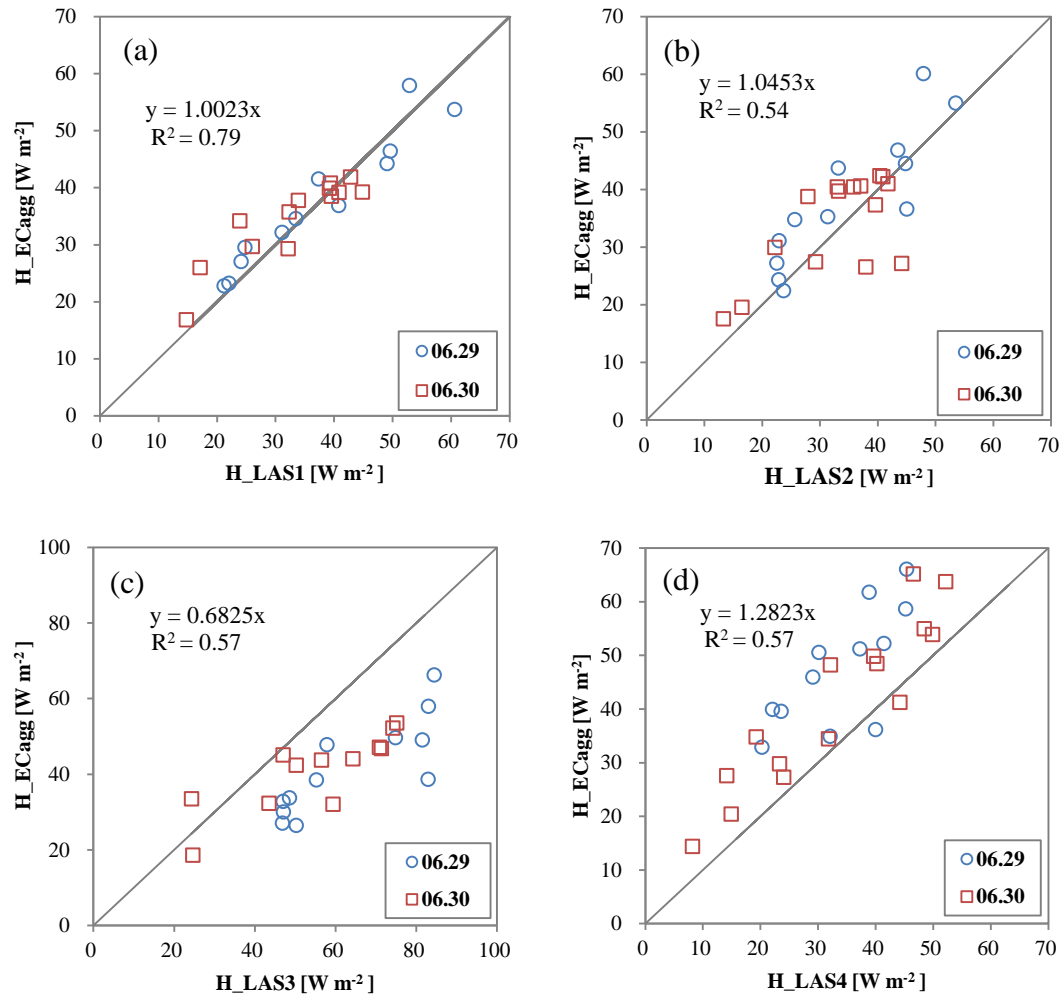

**Fig. 7** The comparison between LAS observed fluxes (X axis) and EC aggregated fluxes (Y axis)

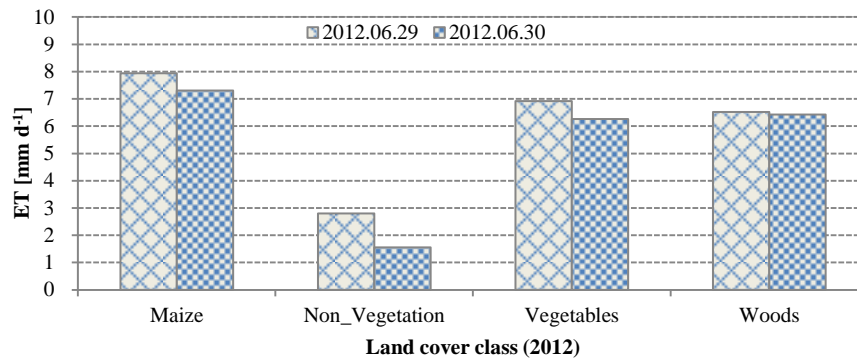

**Fig. 8** The dis-aggregated daily ET of each land covers in the kernel experimental area of HiWATER on 29 and 30 June 2012

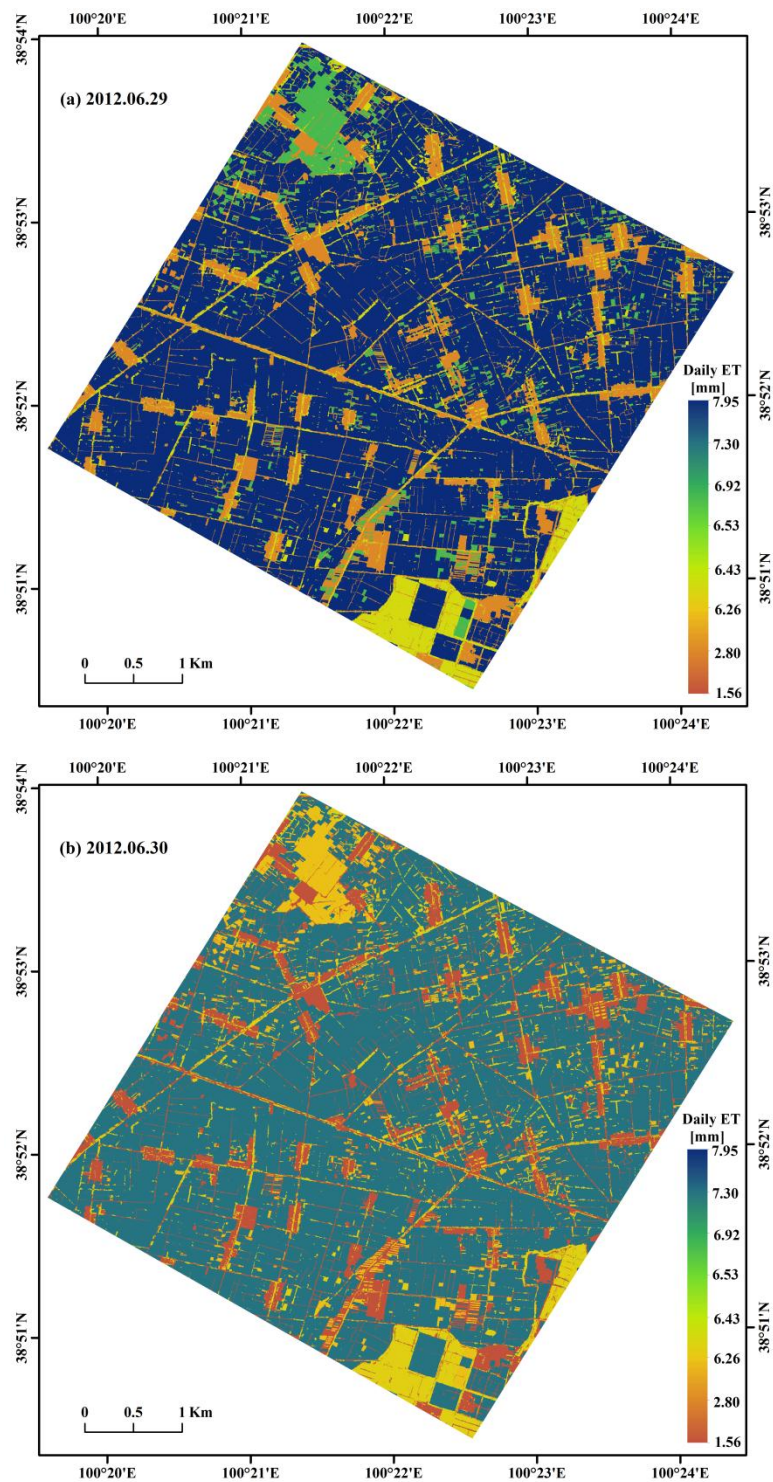

**Fig. 9** Spatial distribution of averaged daily ET in the kernel experimental area of HiWATER
